# Supplementary material
Source: publisher figshare collection journal article supplement (https://sage.figshare.com/ndownloader/files/14878055)
Supplement: Supplementary file 1 [file 14878055]

Obaidat et al. *Anaplasma* spp. in dairy ruminants in Jordan: high individual and herd-level seroprevalence and association with abortions

**Supplementary Table 1.** Factors associated with *Anaplasma* spp. seropositivity in dairy cow farms in Jordan, 2015–2016.

| Variable                                   | No. of farms | No. positive | <i>p</i> value |
|--------------------------------------------|--------------|--------------|----------------|
| Location                                   |              |              | 1.00           |
| Al-Dulail                                  | 21           | 8            |                |
| Highlands                                  | 10           | 3            |                |
| Herd size                                  |              |              | 1.00           |
| Small (10–50)                              | 13           | 5            |                |
| Large ( $\geq 51$ )                        | 18           | 6            |                |
| Recent abortions on the farm               |              |              | 1.00           |
| Yes                                        | 6            | 2            |                |
| No                                         | 25           | 9            |                |
| Abortions occurred on the farm in the past |              |              | 0.27           |
| Yes                                        | 15           | 7            |                |
| No                                         | 16           | 4            |                |
| New animals added to herd                  |              |              | 0.49           |
| Yes                                        | 13           | 6            |                |
| No                                         | 18           | 5            |                |
| How often the farmer cleans the farm       |              |              | 1.00           |
| Every week or less                         | 7            | 2            |                |
| Every 2 wk and more                        | 24           | 9            |                |
| How often the farmer cleans the feeders    |              |              | 1.00           |
| Every week or less                         | 10           | 4            |                |
| Every 2 wk and more                        | 21           | 7            |                |

The *p* values were calculated by Fisher exact test,  $n = 31$ .

**Supplementary Table 2.** Factors associated with *Anaplasma* spp. seropositivity in sheep and goat farms in Jordan, 2015–2016.

| Variable                                                     | No. of farms | No. positive | <i>p</i> value |
|--------------------------------------------------------------|--------------|--------------|----------------|
| Species                                                      |              |              | 1.00           |
| Goats                                                        | 36           | 34           |                |
| Sheep                                                        | 68           | 64           |                |
| Area                                                         |              |              | 0.88           |
| North                                                        | 45           | 43           |                |
| South                                                        | 25           | 23           |                |
| Badia                                                        | 14           | 13           |                |
| Northern Jordan Valley                                       | 20           | 19           |                |
| Flock size                                                   |              |              | 0.37           |
| Small (10–50)                                                | 16           | 14           |                |
| Medium (51–100)                                              | 17           | 16           |                |
| Large (101–150)                                              | 31           | 29           |                |
| Very large ( $\geq 151$ )                                    | 40           | 39           |                |
| Mixing sheep and goats in one farm                           |              |              | 1.00           |
| Yes                                                          | 22           | 21           |                |
| No                                                           | 82           | 77           |                |
| Mixing and adding animals from other farms with your animals |              |              | 0.68           |
| Yes                                                          | 49           | 47           |                |
| No                                                           | 55           | 51           |                |
| Using fences around the farm                                 |              |              | 0.36           |
| Yes                                                          | 73           | 70           |                |
| No                                                           | 31           | 28           |                |
| Grazing your animals for more than 5 km                      |              |              | 1.00           |
| Yes                                                          | 8            | 8            |                |
| No                                                           | 96           | 90           |                |
| How often the farmer cleans the farm                         |              |              | 0.59           |
| Sometimes                                                    | 84           | 78           |                |
| Never                                                        | 20           | 20           |                |
| How often the farmer cleans the feeders                      |              |              | 1.00           |
| Every week or less                                           | 70           | 66           |                |
| Every 2 wk or more                                           | 34           | 32           |                |
| Water source                                                 |              |              | 0.64           |
| Well on the farm                                             | 49           | 45           |                |

|                                                      |    |    |      |
|------------------------------------------------------|----|----|------|
| Spring/lake water                                    | 17 | 17 |      |
| Municipal water                                      | 38 | 36 |      |
| Recent abortions (within last 2 seasons) on the farm |    |    | 0.03 |
| Yes                                                  | 51 | 51 |      |
| No                                                   | 53 | 47 |      |
| Abortion occurred on the farm in the past            |    |    | 0.09 |
| Yes                                                  | 58 | 57 |      |
| No                                                   | 46 | 41 |      |
| Recent mortalities on the farm                       |    |    | 0.18 |
| Yes                                                  | 31 | 31 |      |
| No                                                   | 73 | 67 |      |

The  $p$  values were calculated by Fisher exact test,  $n = 104$ .
